# Supplementary material for: 1,4-Dideoxy-1,4-imino-d- andl-lyxitol-based inhibitors bind to Golgi α-mannosidase II in different protonation forms
Source: Royal Society of Chemistry journal article supplement (doi:10.1039/d2ob01545e), 2022-01-01

## Electronic supplementary information (Part 2):

### 1,4-Dideoxy-1,4-imino-D- and L-lyxitol-based inhibitors bind to Golgi $\alpha$ -mannosidase II in different protonation forms

Juraj Kóňa, <sup>\*a,b</sup> Sergej Šesták,<sup>a</sup> Iain B.H. Wilson,<sup>c</sup> Monika Poláková<sup>\*a</sup>

<sup>a</sup> Institute of Chemistry, Center for Glycomics, Slovak Academy of Sciences, Dúbravská cesta 9, 845 38 Bratislava, Slovakia

<sup>b</sup> Medical Vision, Civic Research Association, Záhradnícka 4837/55, 82108 Bratislava, Slovakia

<sup>c</sup> Department of Chemistry, University of Natural Resources and Life Sciences, 1190 Vienna, Austria

#### Corresponding authors:

Juraj Kóňa and Monika Poláková

Institute of Chemistry, Center for Glycomics, Slovak Academy of Sciences, Dúbravská cesta 9, 84538

E-mail: chemkona@savba.sk, Monika.Polakova@savba.sk

#### Contents:

<sup>1</sup>H and <sup>13</sup>C NMR spectra of the target compounds

Pages 2-12

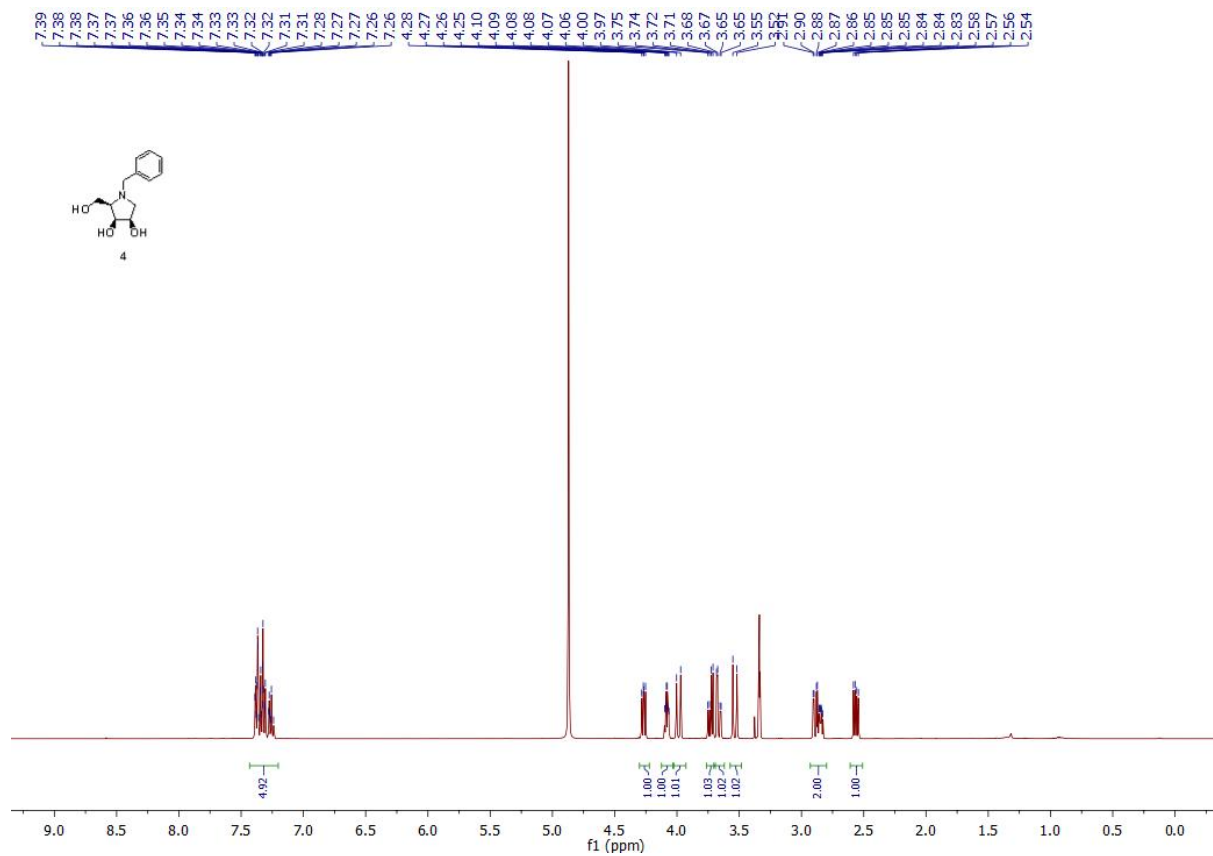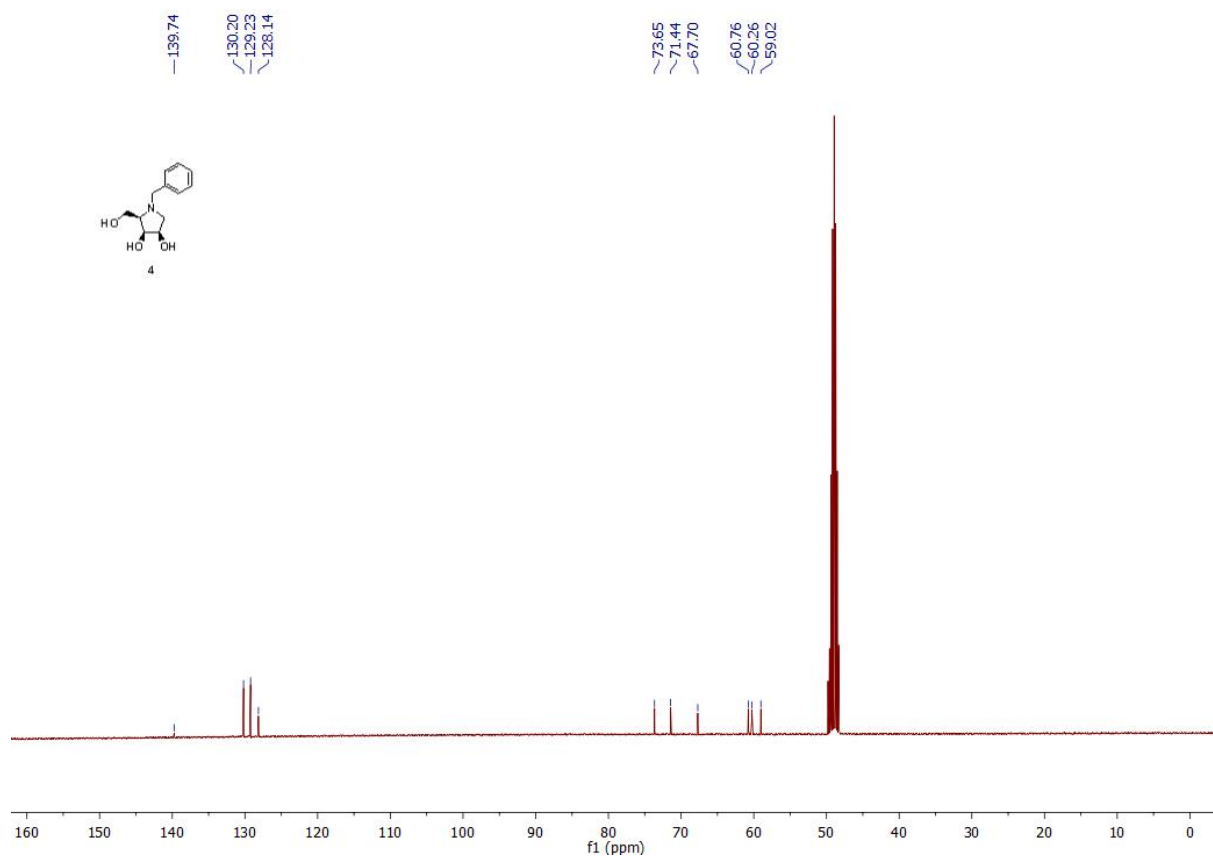

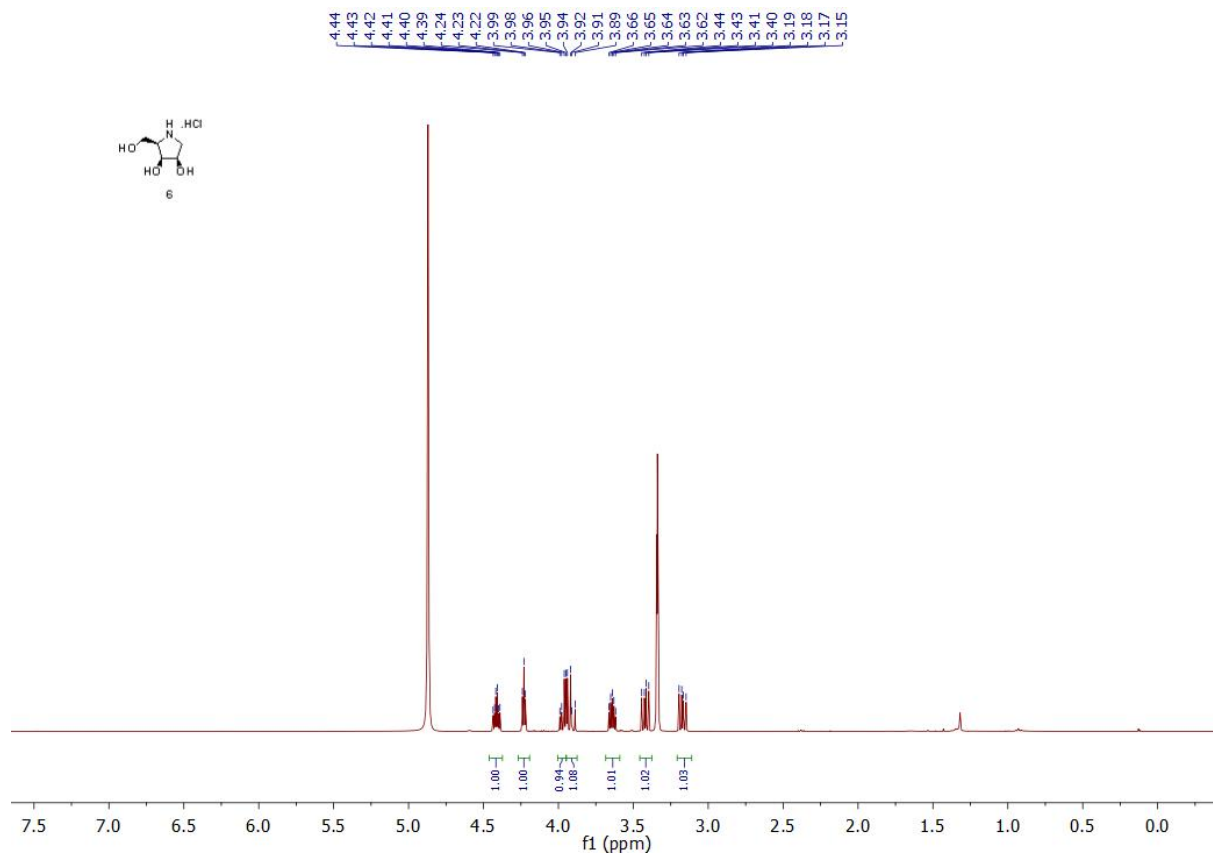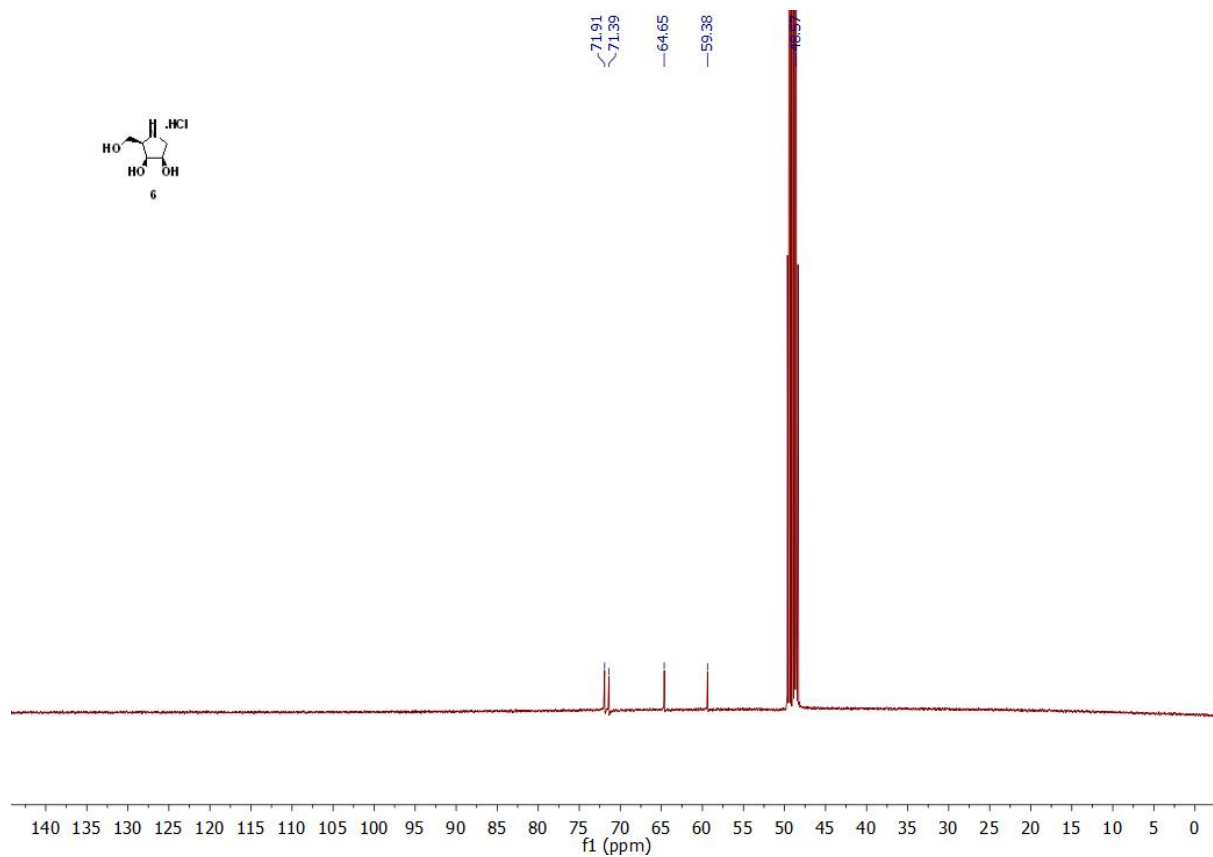

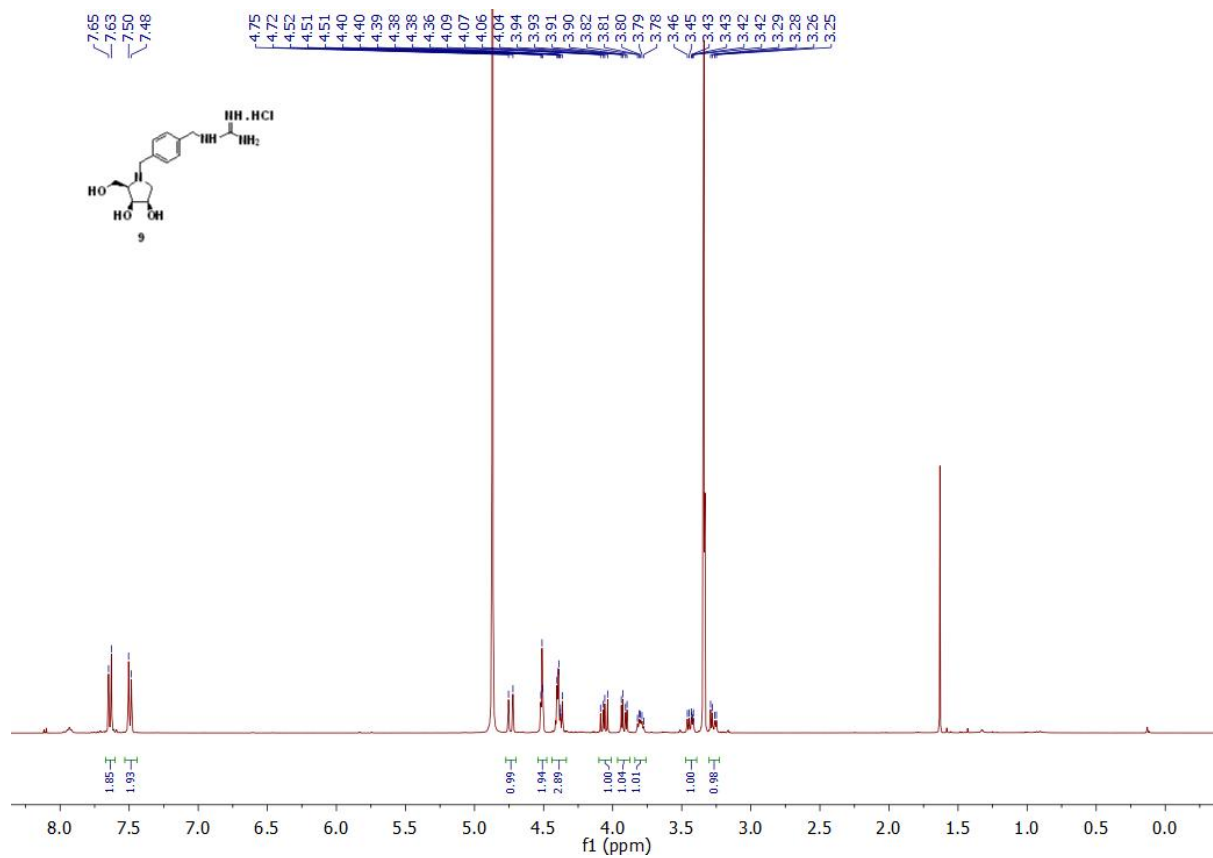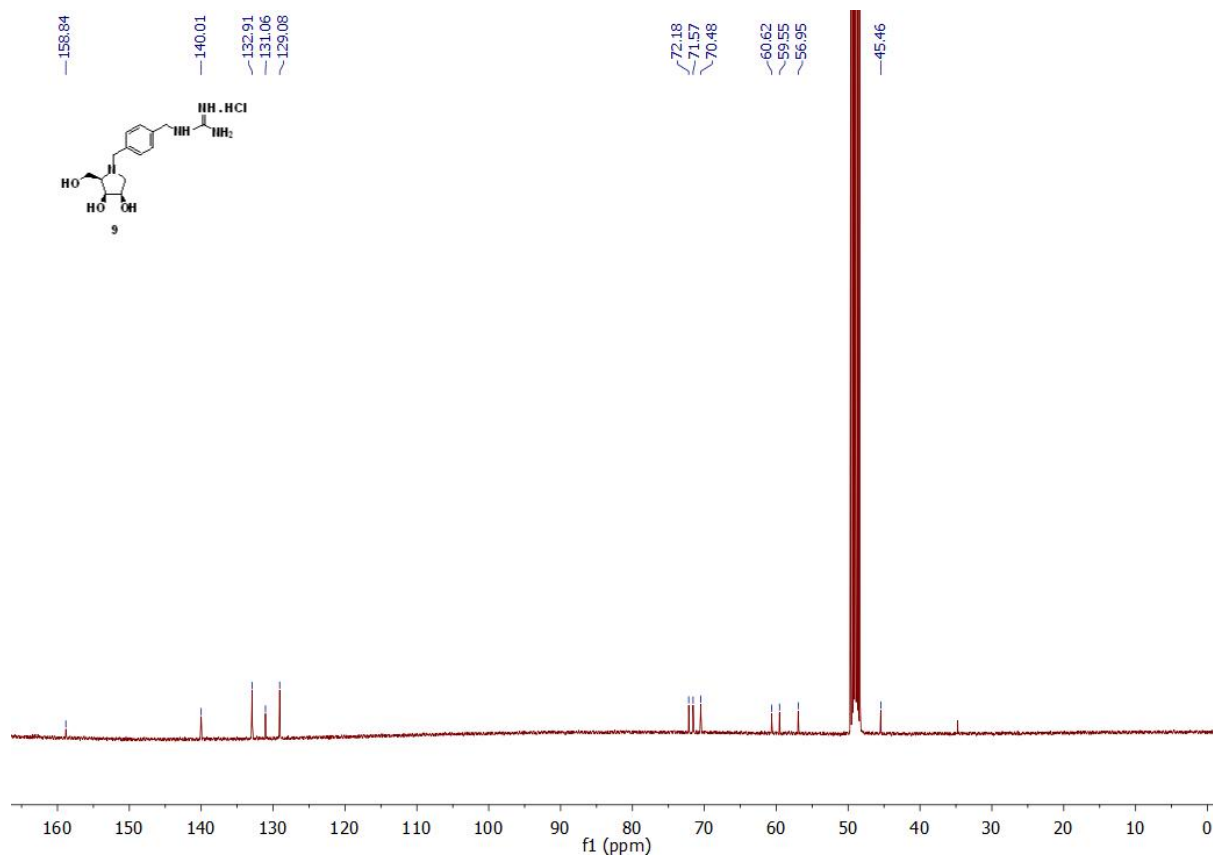

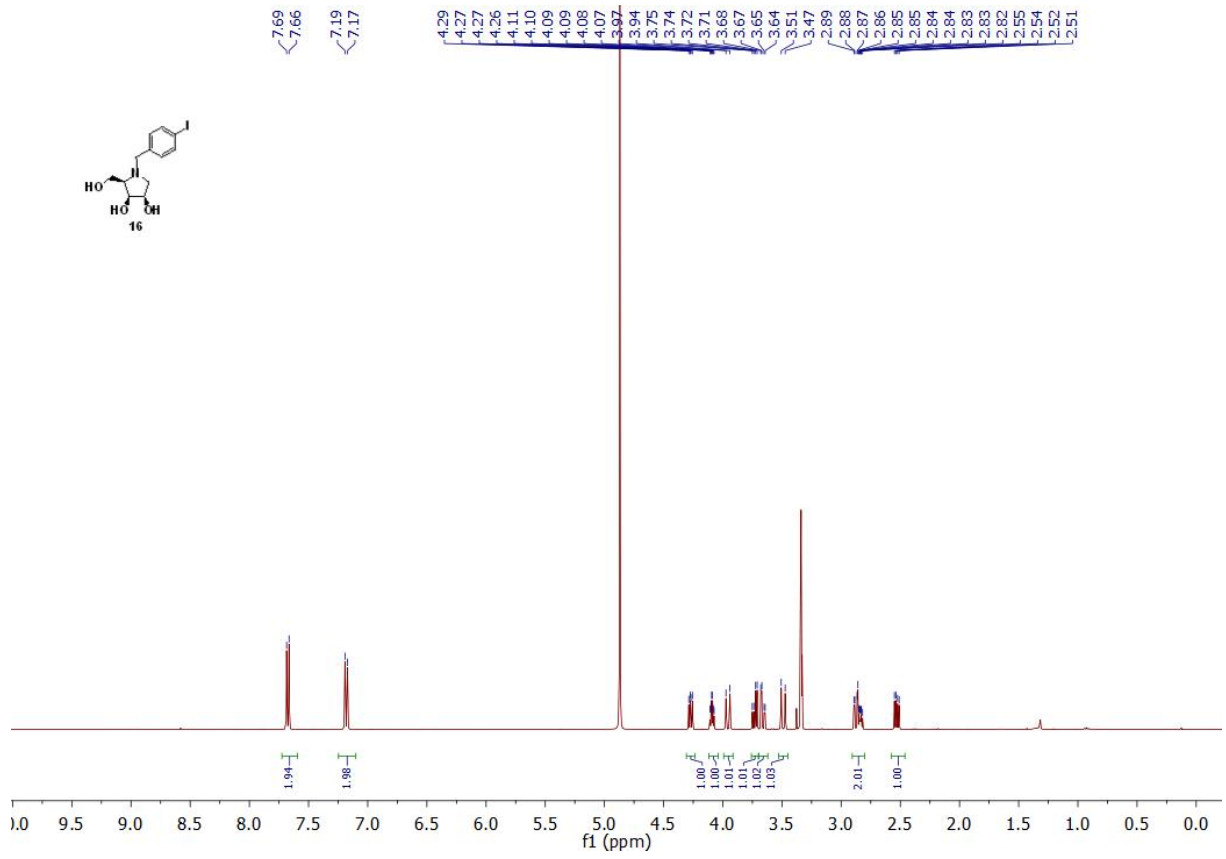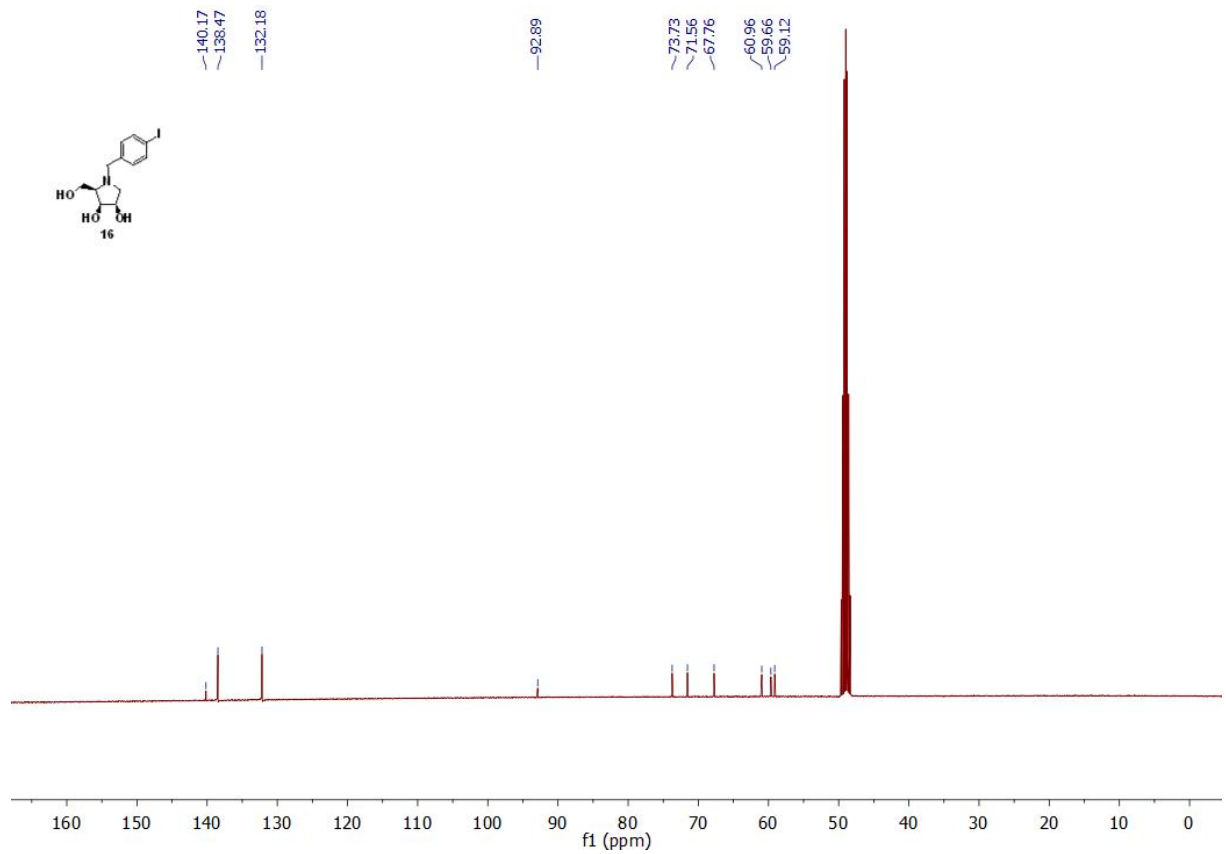

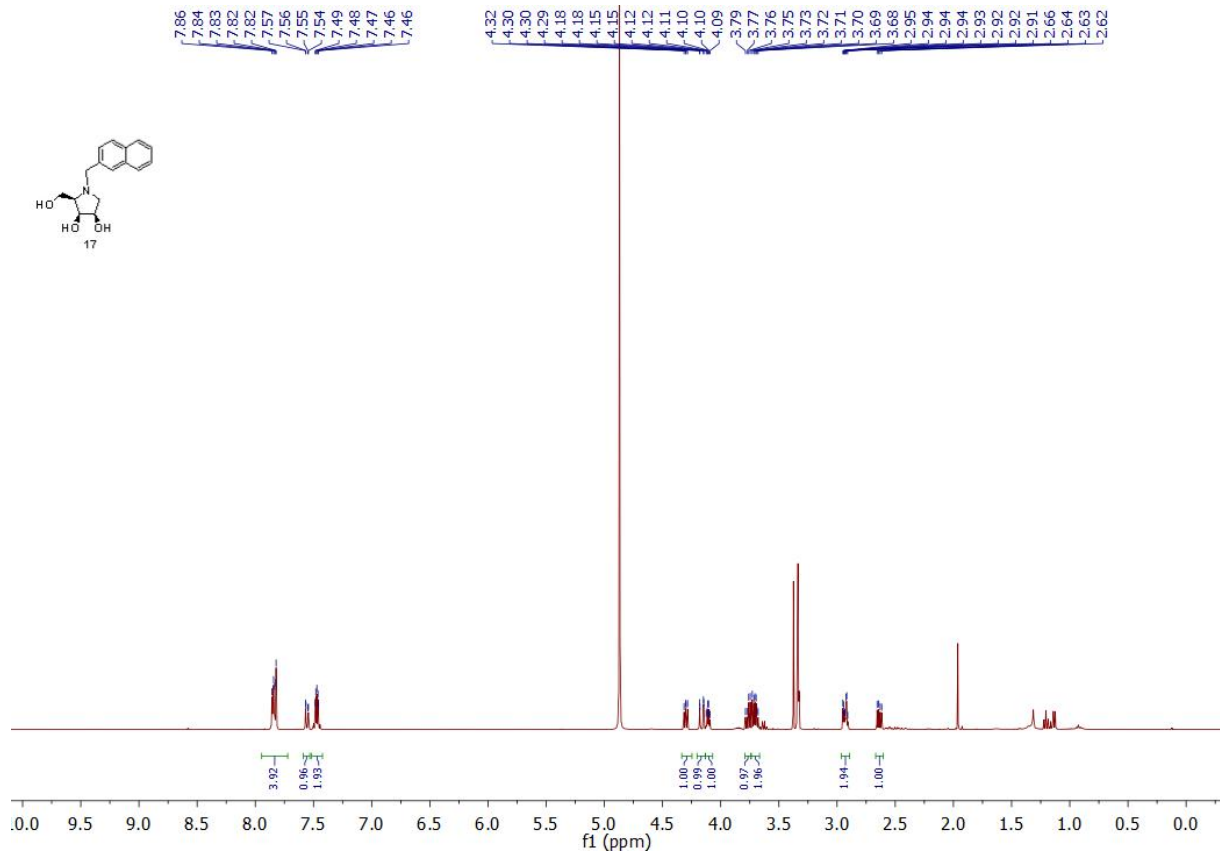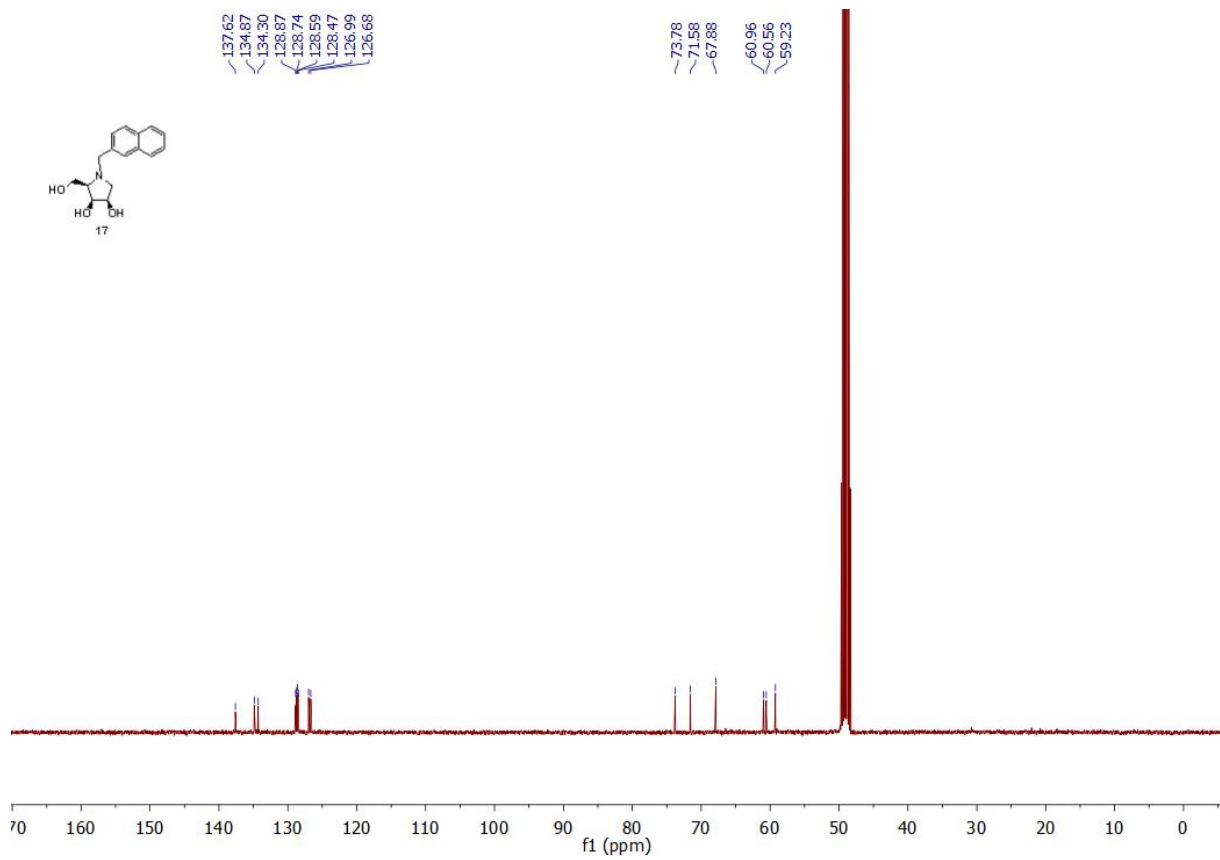

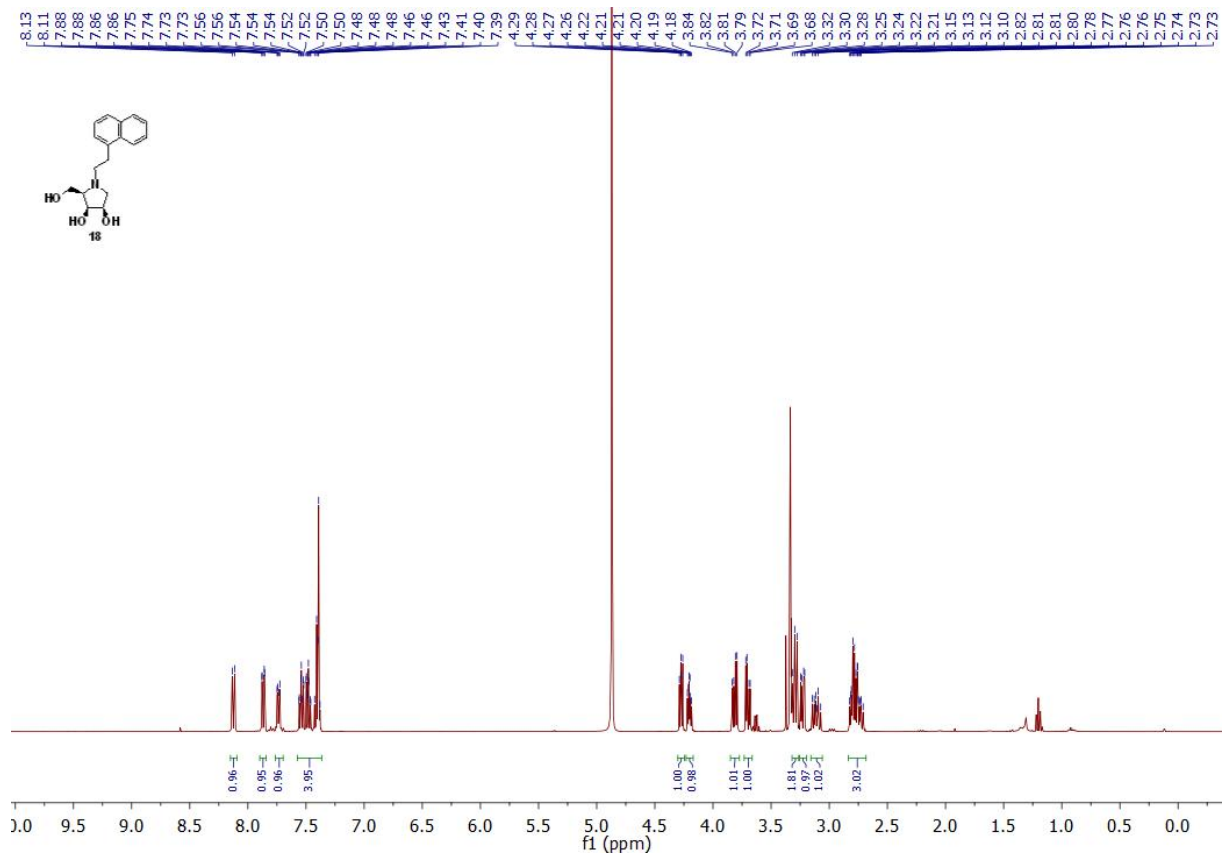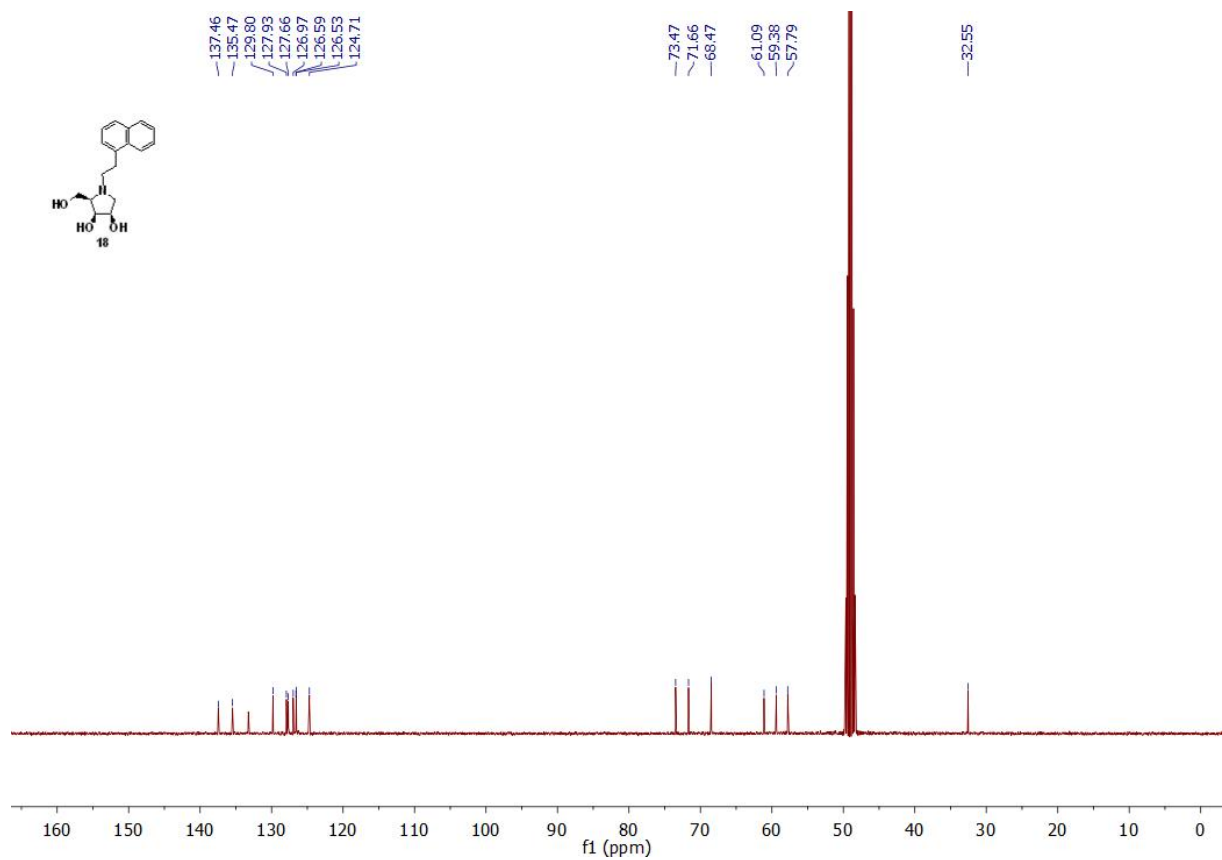

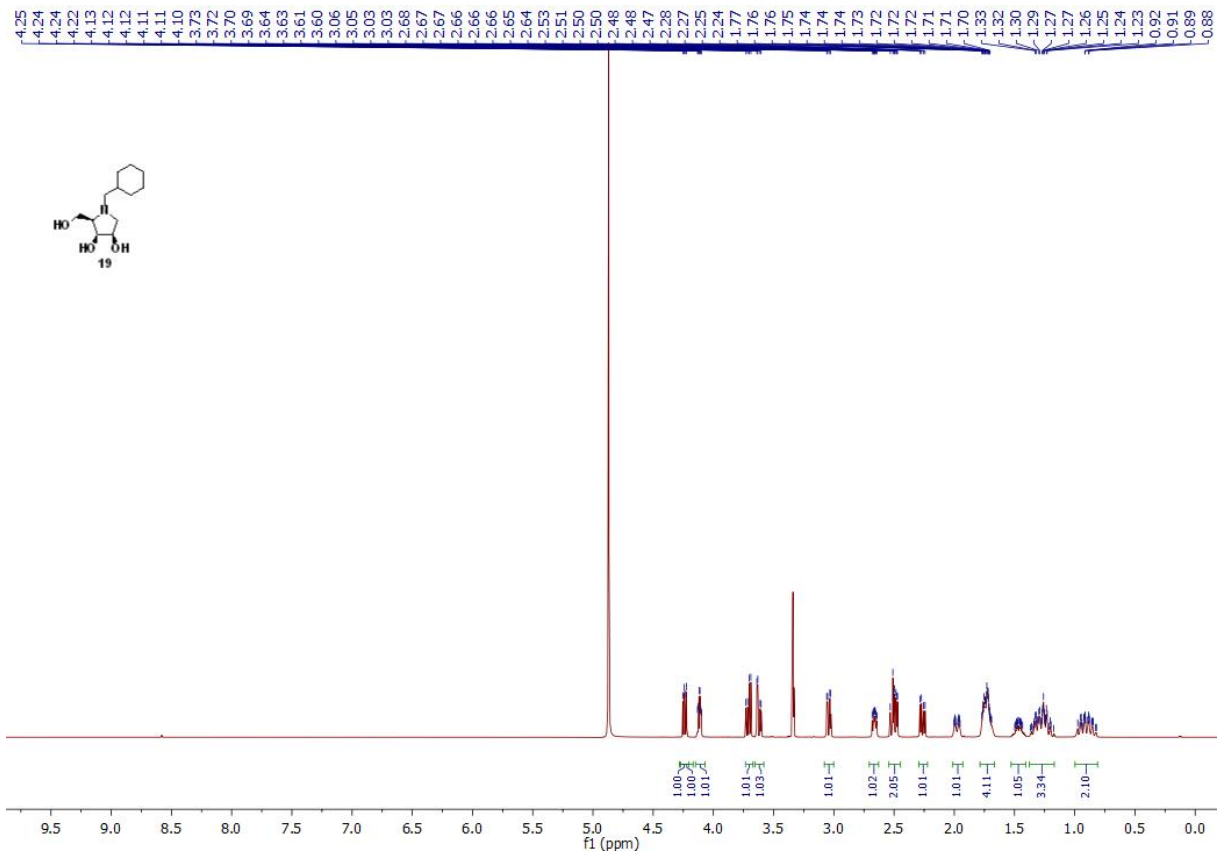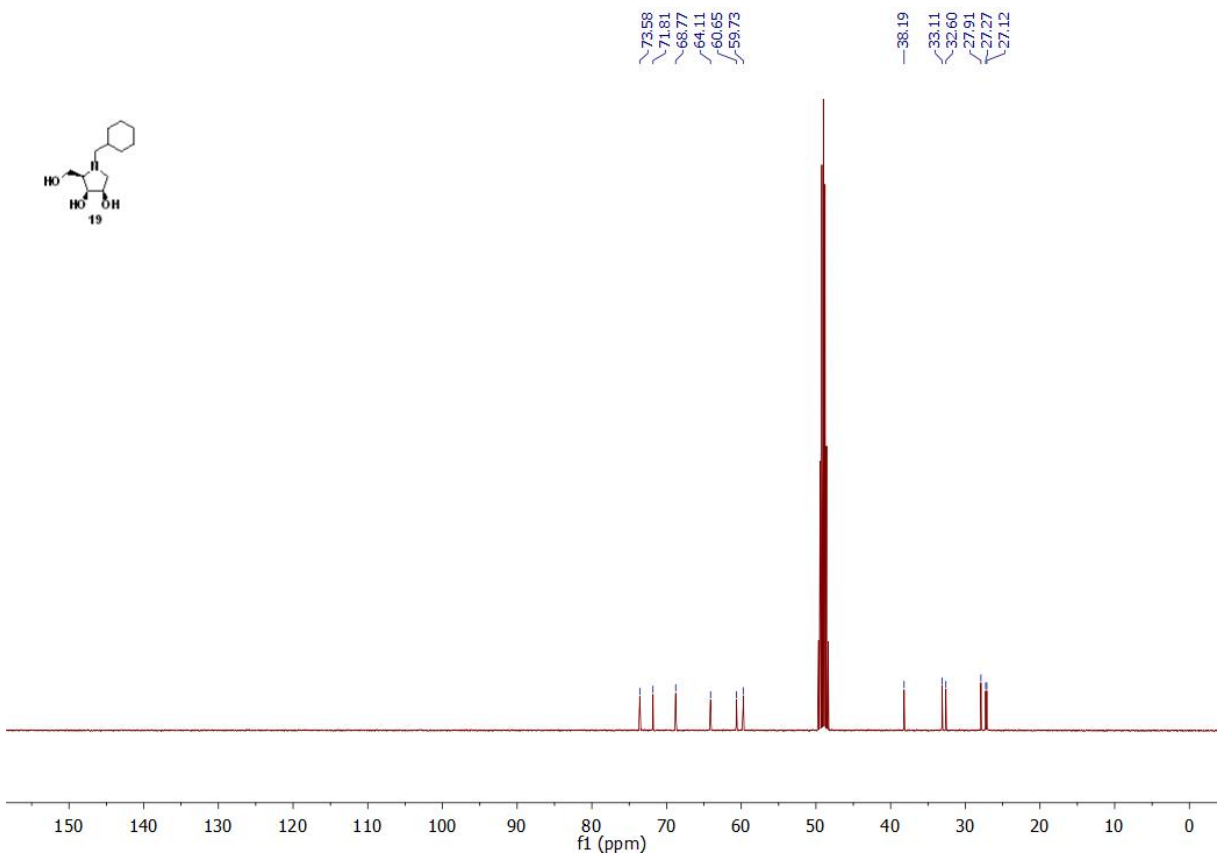



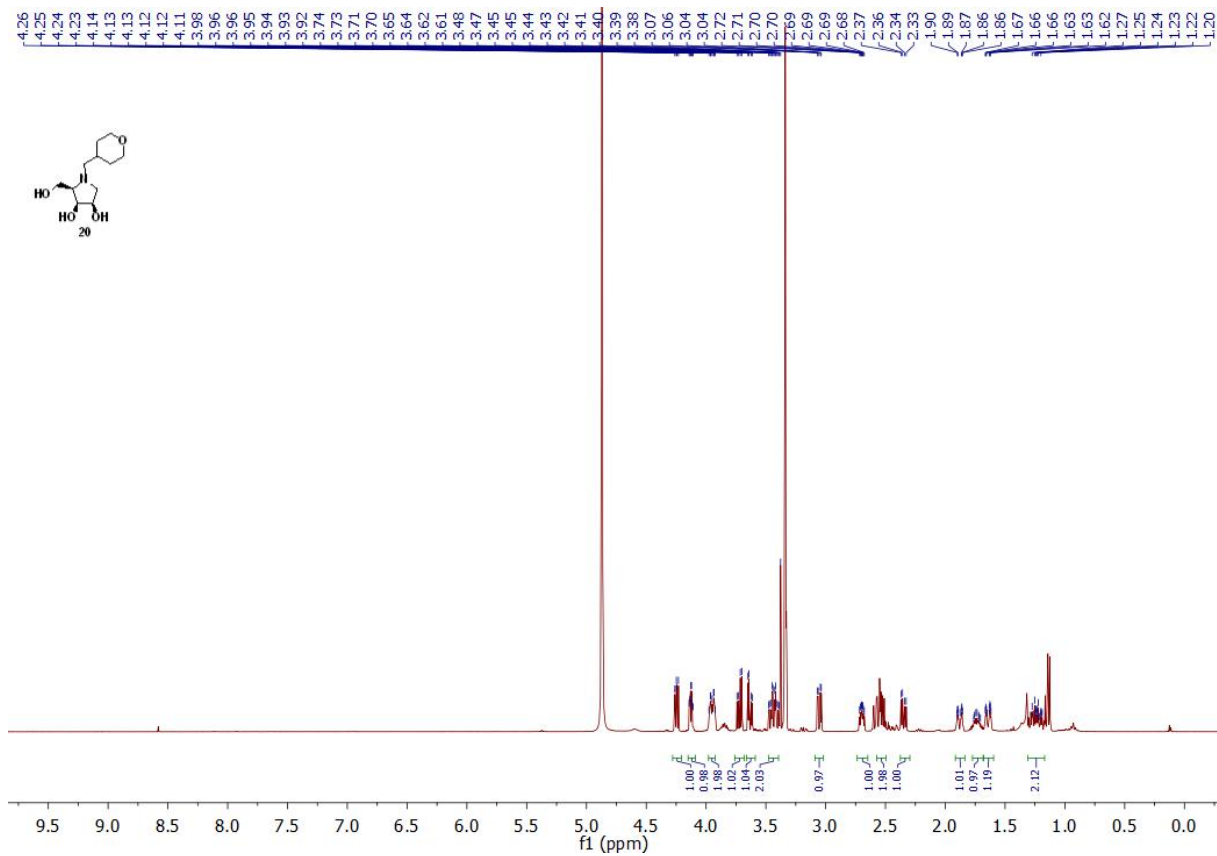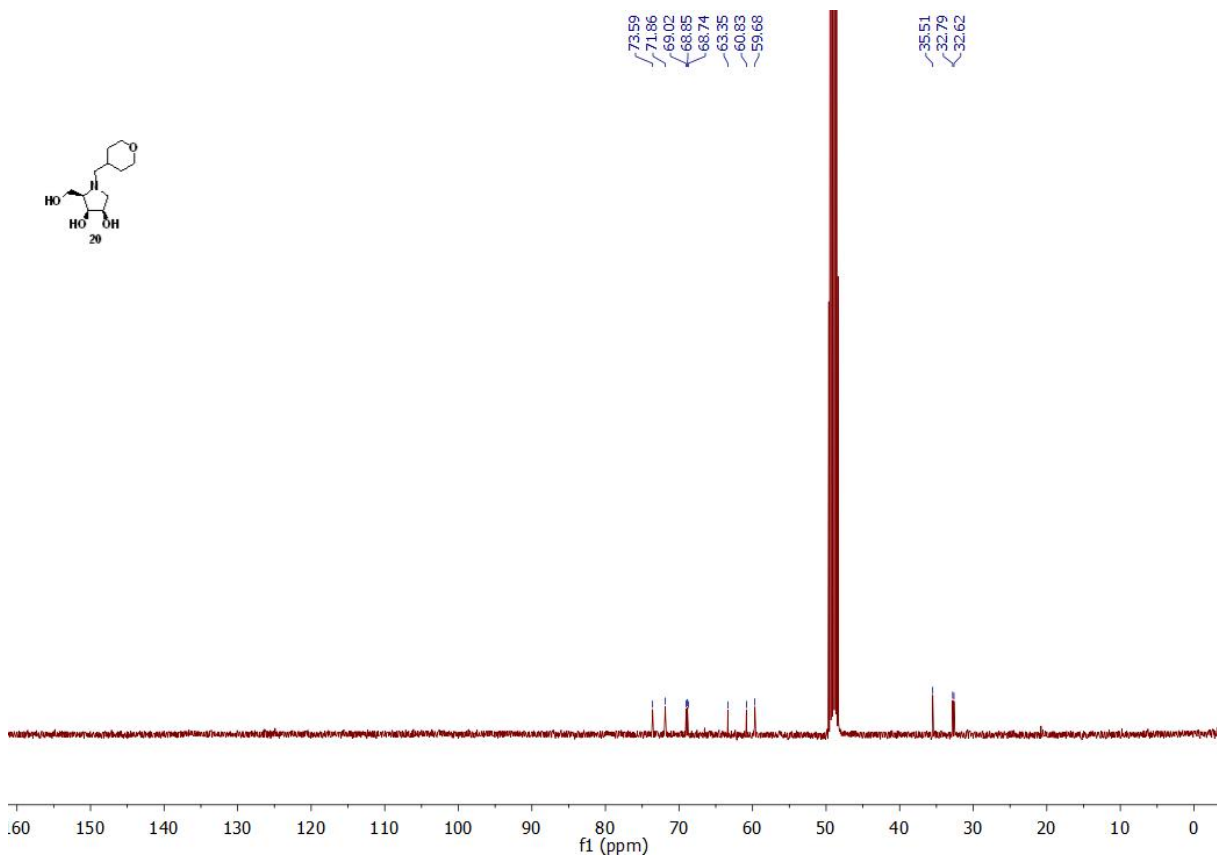

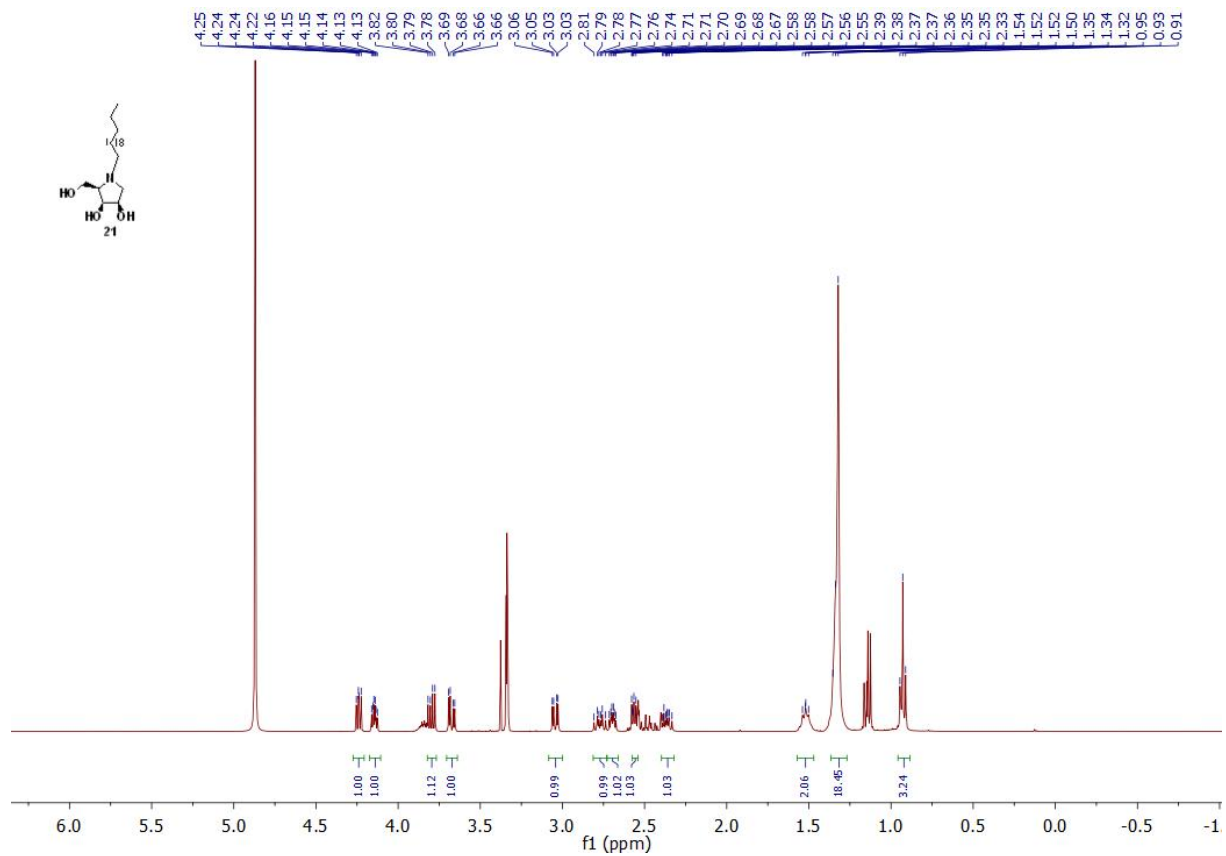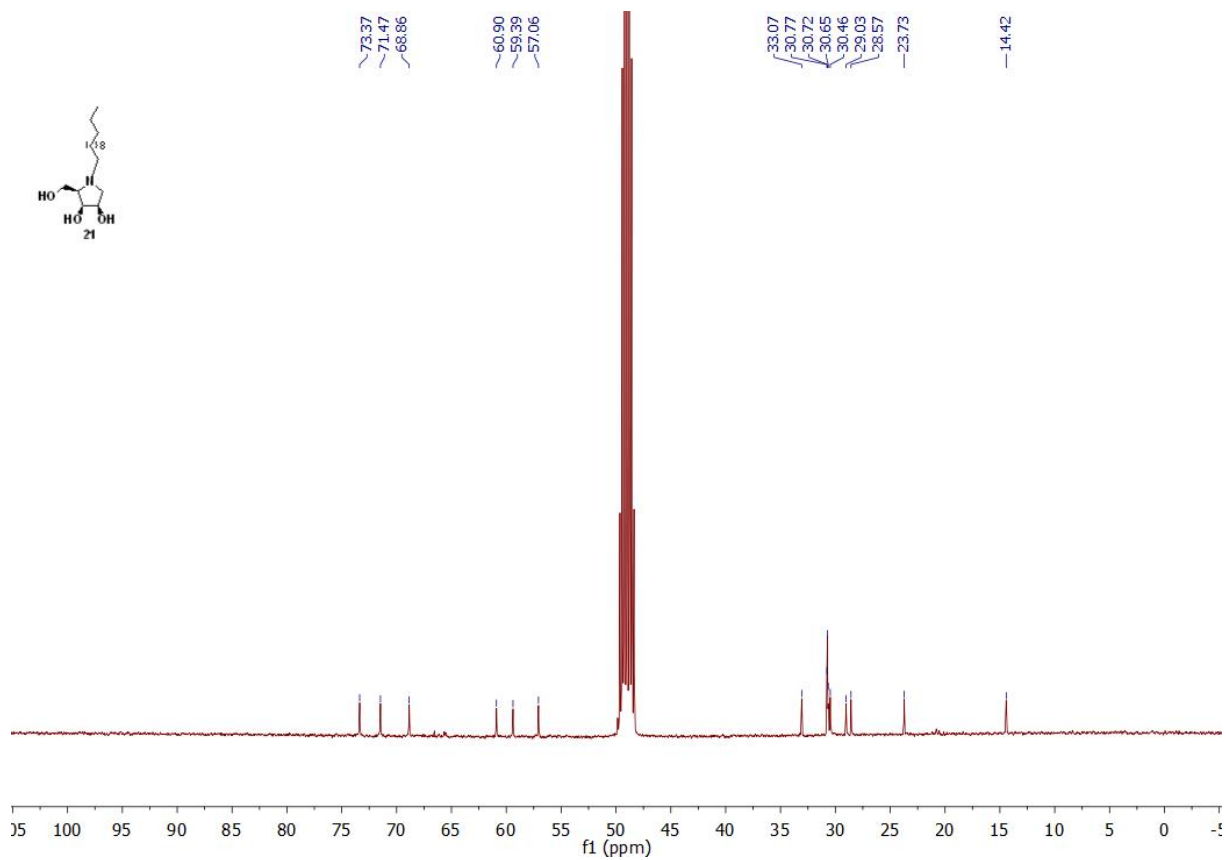

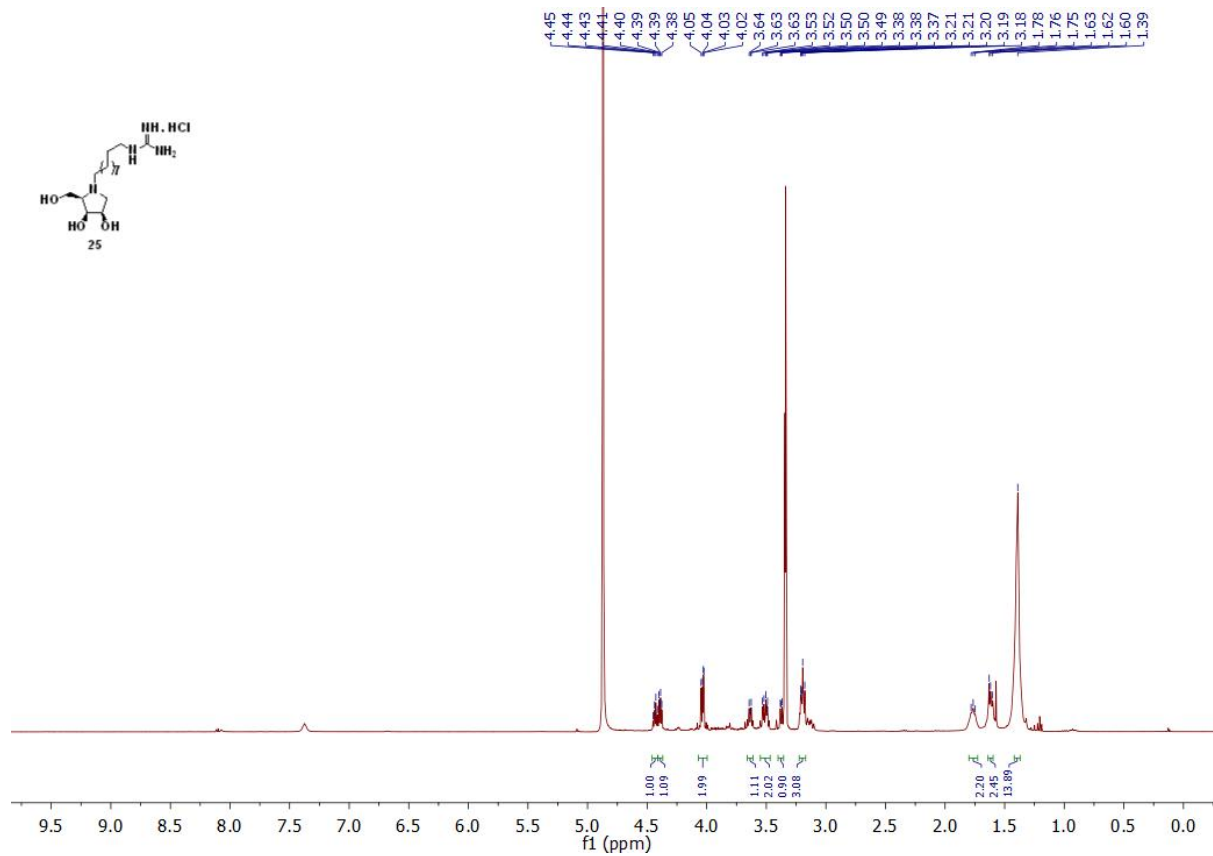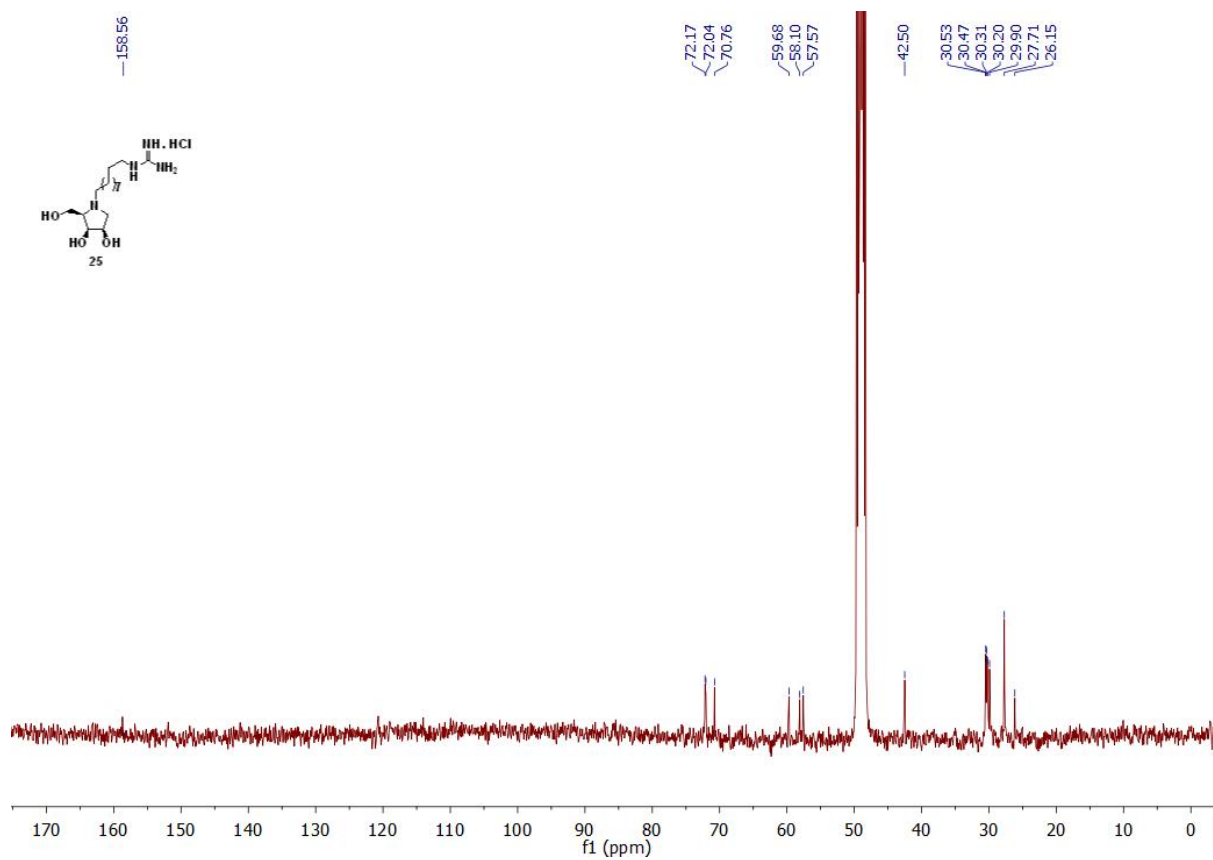

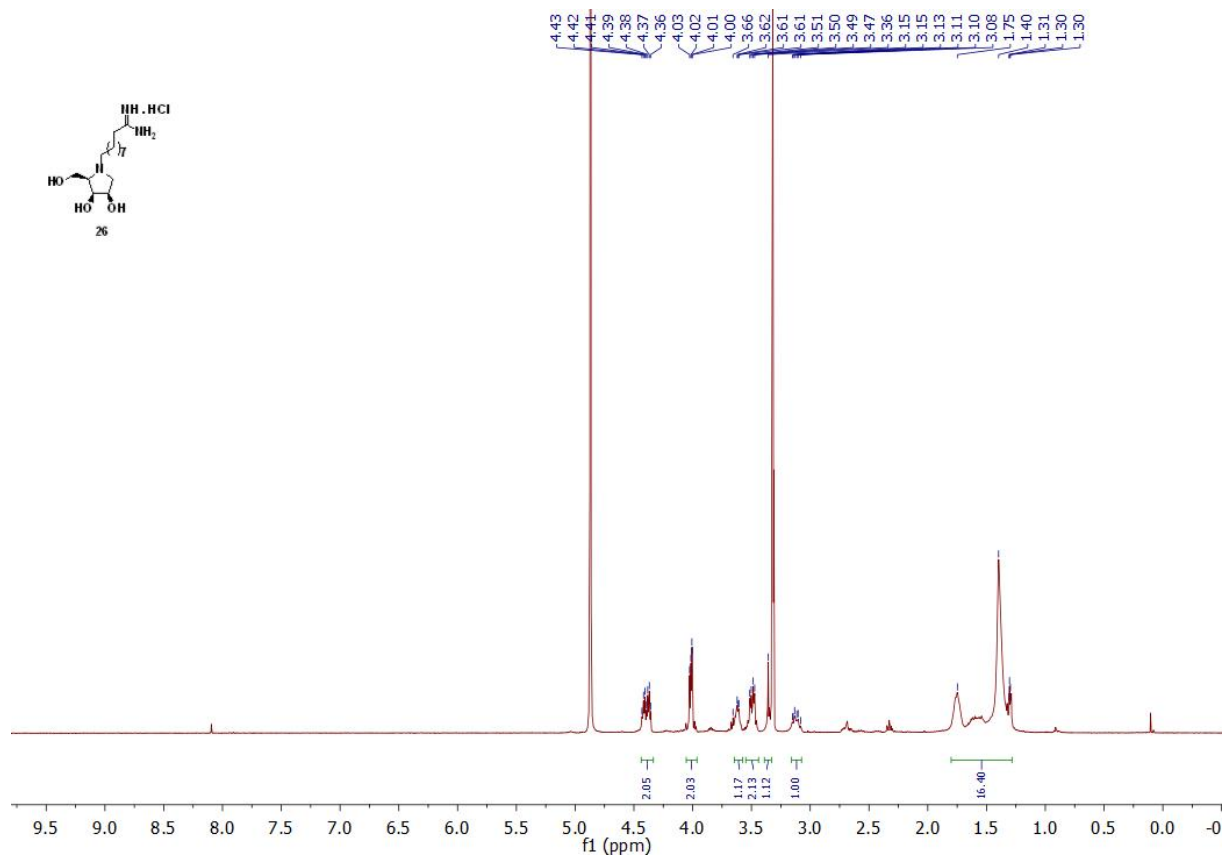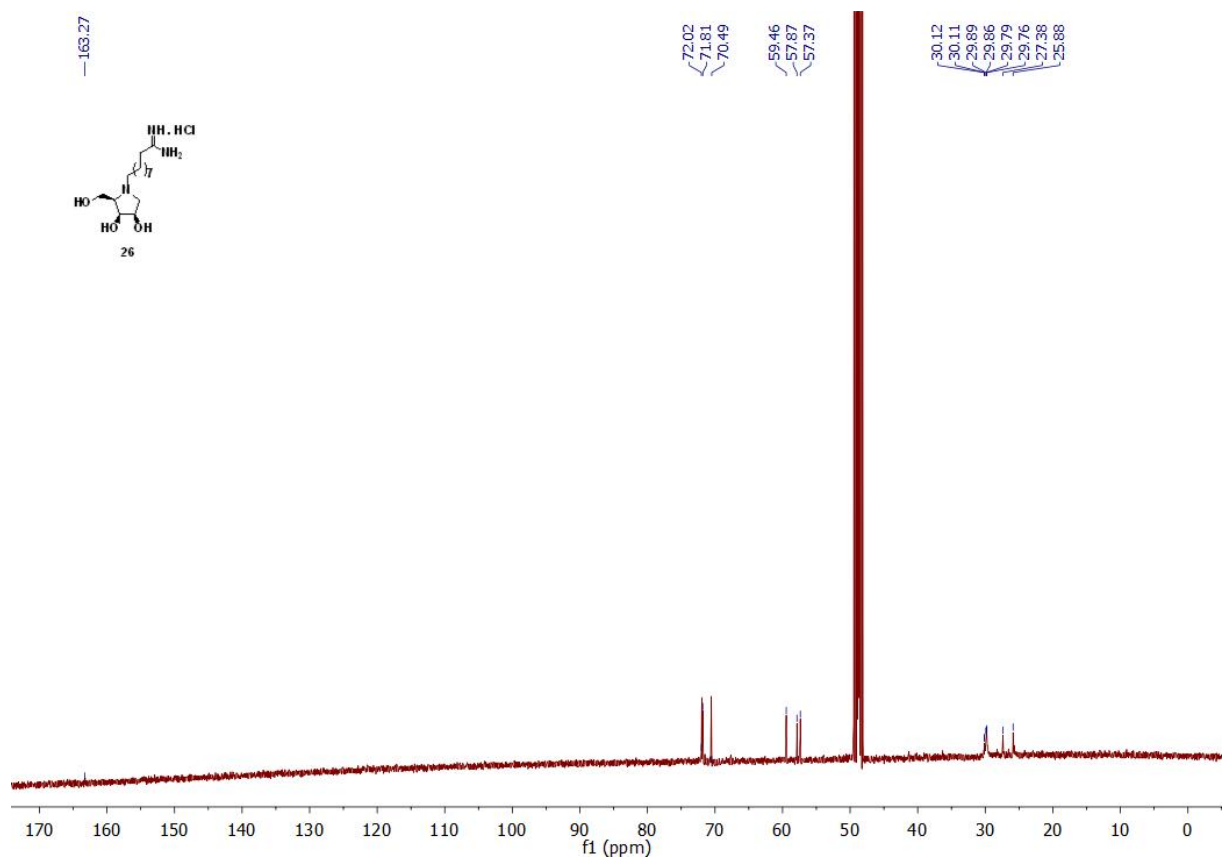

Supplement: d2ob01545e2.pdf [file d2ob01545e2.pdf]
